# Supplementary material
Source: PubMed Central journal article supplement (PMC11108298)
Supplement: 18_2016_2292_MOESM3_ESM.pdf [file 18_2016_2292_MOESM3_ESM.pdf]

## Cellular and Molecular Life Sciences

### A cellular biosensor to evaluate CRM1 nuclear export activity. Functional analysis of the cancer-related mutant E571K.

Iraia García-Santisteban<sup>1#</sup>, Igor Arregi<sup>2</sup>, Marián Alonso-Mariño<sup>2</sup>, María A. Urbaneja<sup>2</sup>, Juan J. Garcia-Vallejo<sup>3</sup>, Sonia Bañuelos<sup>2\*</sup>, Jose A. Rodriguez<sup>1\*</sup>

<sup>1</sup>Department of Genetics, Physical Anthropology and Animal Physiology, University of the Basque Country (UPV/EHU), Leioa, Spain.

<sup>2</sup>Unidad de Biofísica (CSIC, UPV/EHU) and Department of Biochemistry and Molecular Biology, University of the Basque Country, Leioa, Spain.

<sup>3</sup>Department of Molecular Cell Biology and Immunology, VU University Medical Center, Amsterdam, the Netherlands.

<sup>#</sup>Current Address: Division of Cell Biology I, The Netherlands Cancer Institute, Amsterdam, The Netherlands.

\*Corresponding authors

E-mail: [sonia.banuelos@ehu.es](mailto:sonia.banuelos@ehu.es)

E-mail: [josean.rodriiguez@ehu.es](mailto:josean.rodriiguez@ehu.es)

### Supplementary Figure S1

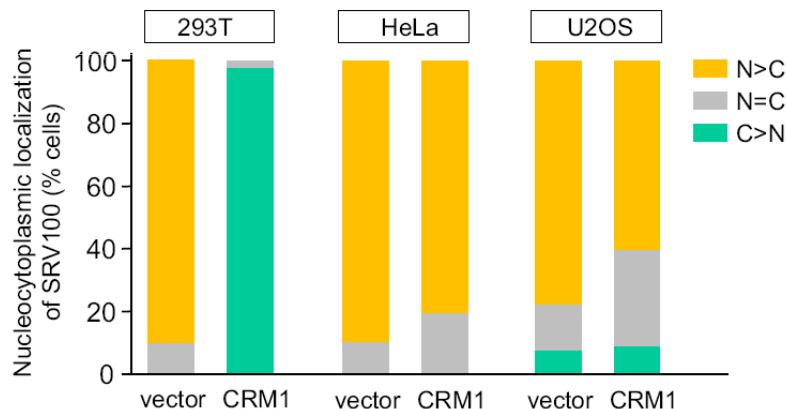

**Supplementary Figure S1.** Nucleocytoplasmic localization of the SRV100 biosensor in three different cell lines when co-expressed with YFP vector (negative control) or with YFP-CRM1. Graph shows the percentage of co-transfected cells showing predominantly nuclear (N>C), nuclear and cytoplasmic (N=C) or predominantly cytoplasmic (C>N) localization of SRV100. At least 200 cells were counted per sample. Co-expression with YFP-CRM1 induced a dramatic relocalization of SRV100 to the cytoplasm of 293T cells. In contrast, only a minor effect was observed in HeLa and U2OS cells.
